# Supplementary material for: Polyploid cancer cells reveal signatures of chemotherapy resistance
Source: Research Square preprint supplement (doi:10.21203/rs.3.rs-4921634/v1), 2024-10-14
Supplement: Supplementary file 1 [file 67cc531529b50fe10d881a71.xlsx]

## Sheet: Sheet1
Table 1: PFS for patient bone marrow samples stained for putative markers.
Patient ID	PFS
1	n.a.*
2	9.6
3	n.a.*
4	6.1
5	1.4
6	4.5
*not part of main trials & was not included.
